# Supplementary material for: Coherent nanoscale cobalt/cobalt oxide heterostructures embedded in porous carbon for the oxygen reduction reaction
Source: PubMed Central journal article supplement — RSC Adv. 2018 Aug 10;8(50):28625–31. doi: 10.1039/c8ra04256j (PMC9084347; doi:10.1039/c8ra04256j), 2018-08-10
Supplement: RA-008-C8RA04256J-s001.pdf [file RA-008-C8RA04256J-s001.pdf]

# Supporting Information

## Coherent nanoscale cobalt/cobalt oxides heterostructures embedded in porous carbon for oxygen reduction reaction

Xue-Cheng Li <sup>a</sup>, Fa-Shuang She <sup>a</sup>, Dong Shen <sup>c</sup>, Chao-Ping Liu <sup>d</sup>, Li-Hua Chen <sup>a</sup>, Yu  
Li <sup>a</sup>, Zhao Deng <sup>a,\*</sup>, Zhen-Hua Chen <sup>b,\*</sup>, Hong-En Wang <sup>a\*</sup>

<sup>a</sup> *State Key Laboratory of Advanced Technology for Materials Synthesis and Processing, Wuhan University of Technology, 122 Luoshi Road, Hongshan District, Wuhan 430070, China. Email: [dengzhao@whut.edu.cn](mailto:dengzhao@whut.edu.cn), [hongenwang@whut.edu.cn](mailto:hongenwang@whut.edu.cn)*

<sup>b</sup> *Shanghai Synchrotron Radiation Facility (SSRF), Shanghai Institute of Applied Physics, Chinese Academy of Sciences, Shanghai 201800, China. Email: [chenzhenhua@sinap.ac.cn](mailto:chenzhenhua@sinap.ac.cn)*

<sup>c</sup> *Department of Chemistry and Center Of Diamond and Advanced Films (COSDAF), City University of Hong Kong, HKSAR, China.*

<sup>d</sup> *Department of Physics, City University of Hong Kong, HKSAR, China.*

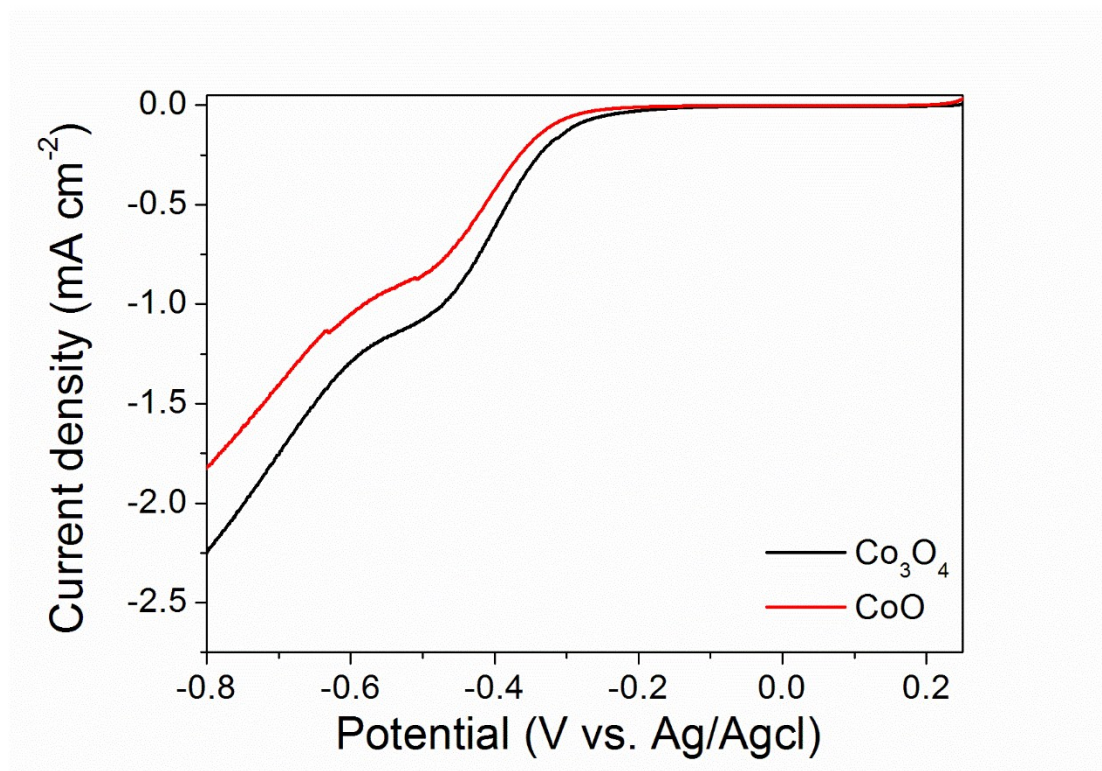

**Figure S1.** LSV curves of the electrodes comprised of commercial Co<sub>3</sub>O<sub>4</sub> (black) and CoO (red) nanoparticles, respectively. The tests were carried out in 0.1 M O<sub>2</sub>-saturated KOH solution at 1600 rpm with a scan rate of 5 mV s<sup>-1</sup>.

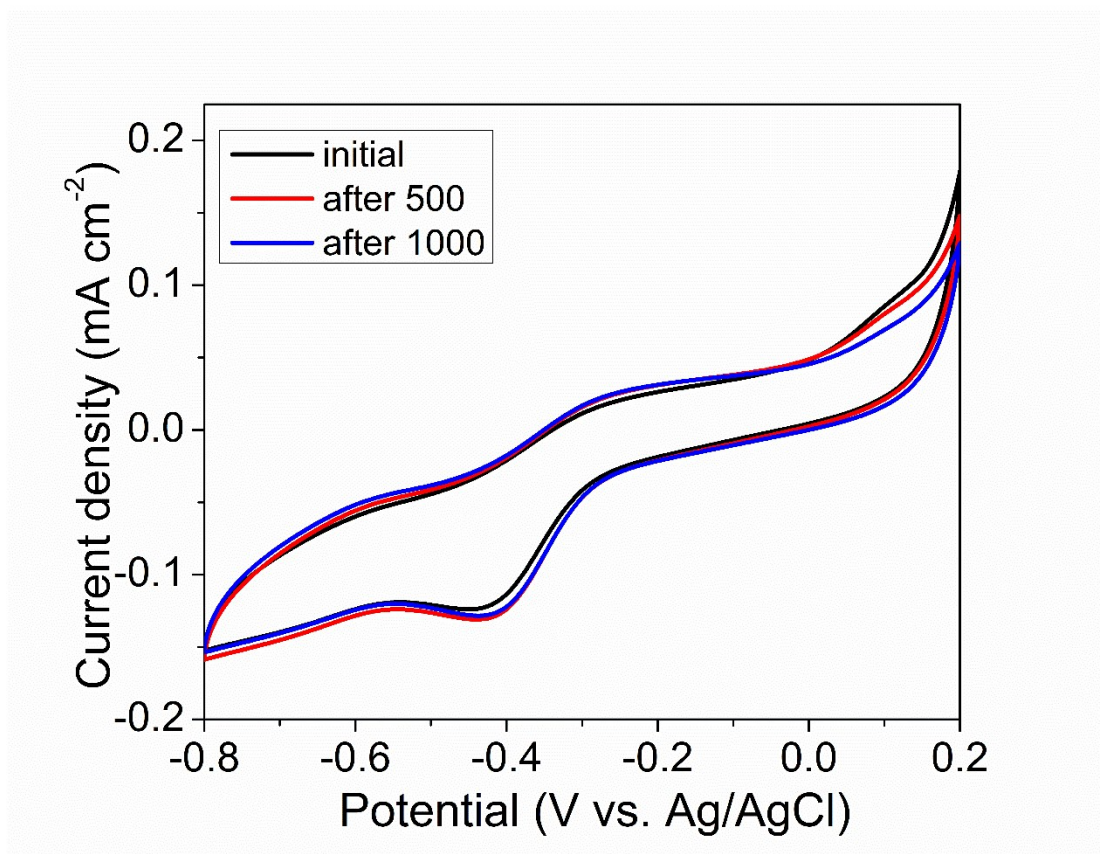

**Figure S2.** The cyclic voltammetry (CV) curves of CoO<sub>x</sub>-800 electrode recorded at 5 mV s<sup>-1</sup> for different cycles.
